# Supplementary material for: Flavivirus-induced antibody cross-reactivity
Source: PubMed Central journal article supplement (PMC3352572; doi:10.1099/vir.0.031641-0), 2011-12
Supplement: supp_92.12.2821_Supplementary_Tables.pdf [file supp_92.12.2821_Supplementary_Tables.pdf]

**Supplementary Table S1.** Neutralization results for sera obtained from a flavivirus-vaccinated human cohort

Neg, Negative; ND, not determined.

| Gender | Vaccinations | Neutralizing antibody titre (PRNT <sub>50</sub> ) |                |       |       |                      |        |      |      |
|--------|--------------|---------------------------------------------------|----------------|-------|-------|----------------------|--------|------|------|
|        |              | Sero-conversion                                   |                |       |       | Cross-neutralization |        |      |      |
|        |              | YFV<br>(17D)                                      | YFV<br>(Asibi) | TBEV  | JEV   | LIV                  | DENV-2 | WNV  | MVEV |
| M      | TBEV, JEV    | Neg                                               | Neg            | 1:10  | 1:20  | 1:10                 | Neg    | Neg  | Neg  |
| M      | TBEV, JEV    | Neg                                               | Neg            | 1:10  | Neg   | 1:10                 | 1:20   | Neg  | Neg  |
| M      | TBEV, JEV    | Neg                                               | Neg            | Neg   | 1:10  | Neg                  | Neg    | Neg  | Neg  |
| M      | TBEV, JEV    | Neg                                               | Neg            | 1:10  | 1:10  | 1:10                 | Neg    | Neg  | Neg  |
| M      | TBEV, JEV    | Neg                                               | Neg            | ND    | 1:20  | ND                   | ND     | Neg  | Neg  |
| M      | TBEV, JEV    | ND                                                | ND             | 1:160 | 1:160 | 1:40                 | Neg    | Neg  | Neg  |
| F      | TBEV, JEV    | Neg                                               | Neg            | Neg   | 1:160 | 1:10                 | Neg    | Neg  | Neg  |
| F      | TBEV, JEV    | Neg                                               | Neg            | Neg   | 1:80  | ND                   | 1:20   | Neg  | Neg  |
| F      | TBEV, JEV    | Neg                                               | Neg            | 1:10  | 1:40  | 1:20                 | Neg    | Neg  | Neg  |
| F      | TBEV, JEV    | Neg                                               | Neg            | Neg   | 1:80  | 1:10                 | Neg    | Neg  | Neg  |
| F      | TBEV, JEV    | Neg                                               | Neg            | 1:10  | 1:40  | Neg                  | 1:20   | Neg  | Neg  |
| F      | TBEV, JEV    | Neg                                               | Neg            | 1:10  | 1:20  | Neg                  | 1:40   | Neg  | Neg  |
| F      | TBEV, JEV    | Neg                                               | Neg            | 1:20  | 1:40  | 1:10                 | Neg    | Neg  | Neg  |
| F      | TBEV, JEV    | Neg                                               | Neg            | 1:40  | 1:160 | 1:10                 | Neg    | 1:20 | Neg  |

**Mansfield, K. L., Horton, D. L., Johnson, N., Li, L., Barrett, A. D. T., Smith, D. J., Galbraith, S. E., Solomon, T. and Fooks, A. R. (2011).** Flavivirus-induced antibody cross-reactivity. *J Gen Virol* **92**, 2821–2829.

|   |                   |      |       |       |       |      |      |       |     |
|---|-------------------|------|-------|-------|-------|------|------|-------|-----|
| M | TBEV, JEV,<br>YFV | Neg  | Neg   | Neg   | 1:40  | Neg  | Neg  | 1:10  | Neg |
| M | TBEV, JEV,<br>YFV | 1:40 | 1:80  | 1:20  | 1:40  | 1:10 | 1:20 | 1:40  | Neg |
| M | TBEV, JEV,<br>YFV | 1:80 | 1:80  | Neg   | 1:10  | Neg  | 1:20 | 1:10  | Neg |
| M | TBEV, JEV,<br>YFV | 1:80 | 1:80  | Neg   | Neg   | ND   | Neg  | Neg   | Neg |
| M | TBEV, JEV,<br>YFV | 1:40 | 1:80  | Neg   | 1:10  | 1:10 | Neg  | Neg   | Neg |
| M | TBEV, JEV,<br>YFV | 1:20 | 1:20  | Neg   | 1:160 | Neg  | 1:20 | 1:160 | Neg |
| M | TBEV, JEV,<br>YFV | 1:40 | 1:40  | 1:10  | 1:80  | Neg  | Neg  | Neg   | Neg |
| M | TBEV, JEV,<br>YFV | 1:40 | 1:80  | 1:160 | 1:80  | 1:40 | 1:80 | 1:80  | Neg |
| F | TBEV, JEV,<br>YFV | 1:80 | 1:160 | ND    | 1:160 | 1:10 | 1:20 | 1:80  | Neg |
| F | TBEV, JEV,<br>YFV | 1:80 | 1:320 | 1:20  | Neg   | 1:20 | Neg  | Neg   | Neg |
| F | TBEV, JEV,<br>YFV | Neg  | Neg   | 1:20  | 1:160 | 1:10 | Neg  | Neg   | Neg |

**Mansfield, K. L., Horton, D. L., Johnson, N., Li, L., Barrett, A. D. T., Smith, D. J., Galbraith, S. E., Solomon, T. and Fooks, A. R. (2011).** Flavivirus-induced antibody cross-reactivity. *J Gen Virol* **92**, 2821–2829.

|   |         |     |      |        |       |        |      |      |     |
|---|---------|-----|------|--------|-------|--------|------|------|-----|
| M | Unknown | Neg | Neg  | 1:20   | 1:40  | 1:10   | Neg  | Neg  | Neg |
| M | Unknown | ND  | ND   | ND     | 1:80  | Neg    | ND   | 1:10 | Neg |
| F | Unknown | Neg | 1:40 | 1:1280 | 1:160 | 1:1280 | 1:40 | 1:40 | Neg |

**Supplementary Table S2.** Details of viruses used in PRNTs

| Virus                                         | Original ID     | Species                        | Location       | Date    |
|-----------------------------------------------|-----------------|--------------------------------|----------------|---------|
| West Nile virus<br>(WNV) – lineage 1          | DAK ArB310      | Mosquito                       | Central Africa | 1967    |
| Louping ill virus<br>(LIV)                    | Louping ill 3/1 | Sheep                          | Oban, Scotland | 1962    |
| Tick-borne<br>encephalitis virus<br>(TBEV)    | Neudoerfl H2J   | Tick ( <i>Ixodes ricinus</i> ) | Austria        | 1950s   |
| Japanese encephalitis<br>virus (JEV)          | P3              | Mosquito                       | China          | 1949    |
| Murray Valley<br>encephalitis virus<br>(MVEV) | H102/94         | Unknown                        | Unknown        | Unknown |
| Dengue-2 (DENV-2)                             | New Guinea C    | Human                          | New Guinea     | 1944    |
| Yellow fever virus<br>(YFV)                   | Asibi           | Human                          | Ghana          | 1927    |

**Mansfield, K. L., Horton, D. L., Johnson, N., Li, L., Barrett, A. D. T., Smith, D. J., Galbraith, S. E., Solomon, T. and Fooks, A. R. (2011).** Flavivirus-induced antibody cross-reactivity. *J Gen Virol* **92**, 2821–2829.

|     |     |                                                          |
|-----|-----|----------------------------------------------------------|
| YFV | 17D | Vaccine strain derived<br>from YFV Asibi,<br>passage 240 |
|-----|-----|----------------------------------------------------------|

**Supplementary Table S3.** Neutralization titres and target distances for selected sera

ED<sub>50</sub>, Reciprocal 50% end-point dilutions; TD, target distance (described in Methods) used for Fig. 3; \*, no distance.

| Serum     | TBEV             |      | JEV              |      | YF 17D           |      | YF Asibi         |      | WNV              |      | LIV              |      | DENV-2           |      |
|-----------|------------------|------|------------------|------|------------------|------|------------------|------|------------------|------|------------------|------|------------------|------|
|           | ED <sub>50</sub> | TD   | ED <sub>50</sub> | TD   | ED <sub>50</sub> | TD   | ED <sub>50</sub> | TD   | ED <sub>50</sub> | TD   | ED <sub>50</sub> | TD   | ED <sub>50</sub> | TD   |
| <b>1</b>  | 10               | 7.0  | 20               | 6.0  | <10              | >7.0 | <10              | >7.0 | <10              | >7.0 | 10               | 7.0  | <10              | >7.0 |
| <b>2</b>  | 10               | 7.0  | <10              | >7.0 | <10              | >7.0 | <10              | >7.0 | <10              | >7.0 | 10               | 7.0  | 20               | 6.0  |
| <b>4</b>  | 10               | 7.0  | 10               | 7.0  | <10              | >7.0 | <10              | >7.0 | <10              | >7.0 | 10               | 7.0  | <10              | >7.0 |
| <b>6</b>  | 160              | 3.0  | 160              | 3.0  | <10              | >7.0 | <10              | >7.0 | <10              | >7.0 | 40               | 5.0  | <10              | >7.0 |
| <b>9</b>  | 10               | 7.0  | 40               | 5.0  | <10              | >7.0 | <10              | >7.0 | <10              | >7.0 | 20               | 6.0  | 10               | >7.0 |
| <b>11</b> | 10               | 7.0  | 40               | 5.0  | <10              | >7.0 | <10              | >7.0 | <10              | >7.0 | <10              | >7.0 | 20               | 6.0  |
| <b>12</b> | 10               | 7.0  | 20               | 6.0  | <10              | >7.0 | <10              | >7.0 | <10              | >7.0 | <10              | >7.0 | 40               | 5.0  |
| <b>13</b> | 20               | 6.0  | 40               | 5.0  | <10              | >7.0 | <10              | >7.0 | <10              | >7.0 | 10               | 7.0  | <10              | >7.0 |
| <b>14</b> | 40               | 5.0  | 160              | 3.0  | <10              | >7.0 | <10              | >7.0 | 20               | 6.0  | 10               | 7.0  | <10              | >7.0 |
| <b>16</b> | 20               | 6.0  | 40               | 5.0  | 40               | 5.0  | 80               | 4.0  | 40               | 5.0  | 10               | 7.0  | 20               | 6.0  |
| <b>17</b> | <10              | >7.0 | 10               | 7.0  | 80               | 4.0  | 80               | 4.0  | 10               | 7.0  | <10              | >7.0 | 20               | 6.0  |
| <b>19</b> | <10              | >7.0 | 10               | 7.0  | 40               | 5.0  | 80               | 4.0  | <10              | >7.0 | 10               | 7.0  | <10              | >7.0 |

Mansfield, K. L., Horton, D. L., Johnson, N., Li, L., Barrett, A. D. T., Smith, D. J., Galbraith, S. E., Solomon, T. and Fooks, A. R. (2011). Flavivirus-induced antibody cross-reactivity. *J Gen Virol* **92**, 2821–2829.

|           |     |     |     |      |     |      |     |      |     |      |    |     |     |      |
|-----------|-----|-----|-----|------|-----|------|-----|------|-----|------|----|-----|-----|------|
| <b>22</b> | 160 | 3.0 | 80  | 4.0  | 40  | 5.0  | 80  | 4.0  | 80  | 4.0  | 40 | 5.0 | 80  | 4.0  |
| <b>23</b> | *   | *   | 160 | 3.0  | 80  | 4.0  | 160 | 3.0  | 80  | 4.0  | 10 | 7.0 | 20  | 6.0  |
| <b>24</b> | 20  | 6.0 | <10 | >7.0 | 80  | 4.0  | 320 | 2.0  | <10 | >7.0 | 20 | 6.0 | <10 | >7.0 |
| <b>25</b> | 20  | 6.0 | 160 | 3.0  | <10 | >7.0 | <10 | >7.0 | <10 | >7.0 | 10 | 7.0 | <10 | >7.0 |
| <b>26</b> | 20  | 6.0 | 40  | 5.0  | <10 | >7.0 | <10 | >7.0 | <10 | >7.0 | 10 | 7.0 | <10 | >7.0 |

**Mansfield, K. L., Horton, D. L., Johnson, N., Li, L., Barrett, A. D. T., Smith, D. J., Galbraith, S. E., Solomon, T. and Fooks, A. R. (2011).** Flavivirus-induced antibody cross-reactivity. *J Gen Virol* **92**, 2821–2829.
